- device (SonoHeart) in critically ill patients. *J Cardiothorac Vasc Anesth* 2005; 19:155-9
37. Molenat F, Boussuges A, Valantin V, Sainty JM: Gallbladder abnormalities in medical ICU patients: An ultrasonographic study. *Intensive Care Med* 1996; 22:356-8
  38. Liteplo AS, Murray AF, Kimberly HH, Noble VE: Real-time resolution of sonographic B-lines in a patient with pulmonary edema on continuous positive airway pressure. *Am J Emerg Med* 2010; 28:541.e5-8
  39. Via G, Lichtenstein D, Mojoli F, Rodi G, Neri L, Storti E, Klersy C, Iotti G, Braschi A: Whole lung lavage: A unique model for ultrasound assessment of lung aeration changes. *Intensive Care Med* 2010; 36:999-1007
  40. Bouhemad B, Brisson H, Le-Guen M, Arbelot C, Lu Q, Rouby JJ: Bedside ultrasound assessment of positive end-expiratory pressure-induced lung recruitment. *Am J Respir Crit Care Med* 2011; 183:341-7
  41. Eisen LA, Leung S, Gallagher AE, Kvetan V: Barriers to ultrasound training in critical care medicine fellowships: A survey of program directors. *Crit Care Med* 2010; 38:1978-83

## ANESTHESIOLOGY REFLECTIONS FROM THE WOOD LIBRARY-MUSEUM

### Cocaine/Eucaine Sales Register: *Déjà Vu* or *Tête-bêche*?

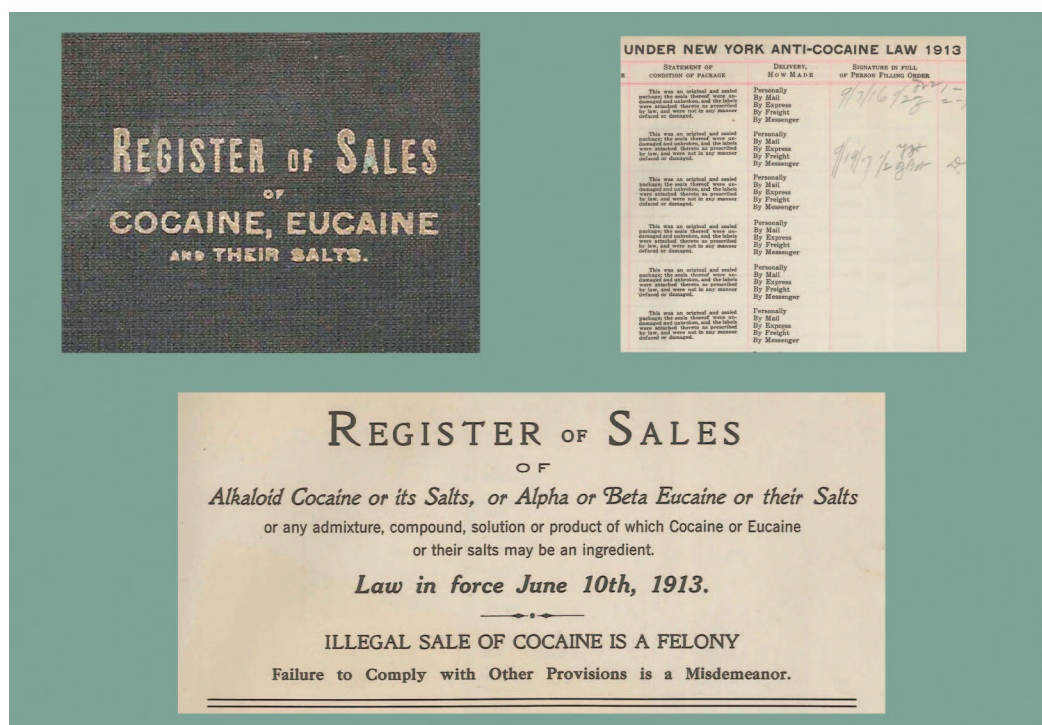

If this image of a *Cocaine and Eucaine Register of Sales* seems like *déjà vu*, that is because it is the “reverse” or “upside-down” book built into the opposite pagings of the *Cocaine and Eucaine Register of Purchases*, which was featured as one of our September 2012 Anesthesiology Reflections. Such an unusual binding is called a *tête-bêche* (French for “head-to-toe”). In other words, if you start at the front cover of the *Purchases*, read right-hand pages to the last page, close the book to reveal the back cover, and then rotate the book 180 degrees, you will see that *Purchase*’s back cover is actually the upside-down front cover of *Sales*. Now if you were a librarian at the Wood Library-Museum, how would you shelf *Sales*— upside up or upside down? (Copyright © the American Society of Anesthesiologists, Inc.)

George S. Bause, M.D., M.P.H., Honorary Curator, ASA’s Wood Library-Museum of Anesthesiology, Park Ridge, Illinois, and Clinical Associate Professor, Case Western Reserve University, Cleveland, Ohio. UJYC@aol.com.
